# Supplementary material for: Insecticidal Activity of Four Lignans Isolated from Phryma leptostachya
Source: PubMed Central journal article supplement (PMC6572576; doi:10.3390/molecules24101976), 2019-05-22
Supplement: molecules-24-01976-s001.pdf [file molecules-24-01976-s001.pdf]

## Supplementary Files

# Insecticidal Activity of Four Lignans Isolated from *Phryma leptostachya*

Yankai Li <sup>1,2</sup>, Jiaqi Wei <sup>1,2</sup>, Jiameng Fang <sup>1,2</sup>, Wenbo Lv <sup>1,2</sup>, Yufei Ji <sup>1,2</sup>, Ahmed A.A. Aioub <sup>1,2,5</sup>, Jiwen Zhang <sup>2,3</sup> and Zhaonong Hu<sup>1,2,4\*</sup>

<sup>1</sup> Institute of Pesticide Science, College of Plant Protection, Northwest A & F University, Yangling, Shaanxi, 712100, P. R. China

<sup>2</sup> Key Laboratory for Botanical Pesticide R & D of Shaanxi Province, Yangling, Shaanxi, 712100, P. R. China

<sup>3</sup> College of Chemistry & Pharmacy, Northwest A & F University, Yangling, Shaanxi, 712100, P. R. China

<sup>4</sup> Key Laboratory of Integrated Pest Management on Crops in Northwestern Loess Plateau, Ministry of Agriculture, Yangling, Shaanxi, 712100, P. R. China

<sup>5</sup> Plant Protection Department, Faculty of Agriculture, Zagazig University, 44511 Zagazig, Egypt

\* Authors to whom correspondence should be addressed; E-Mails: huzhaonong@nwsuaf.edu.cn; Tel./Fax: +86 29 87093987.

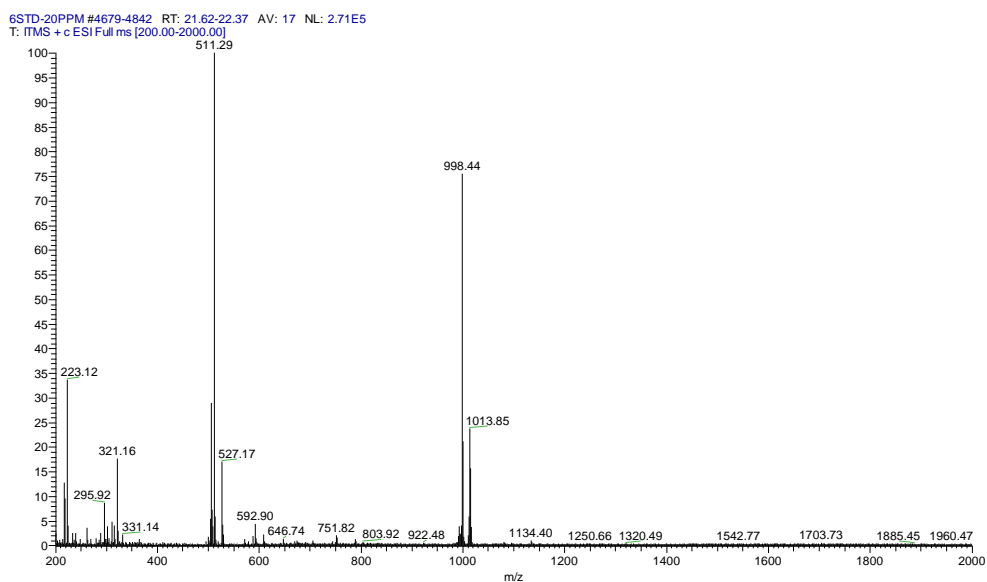

Figure S1. ESI-MS spectrum of compound T1.

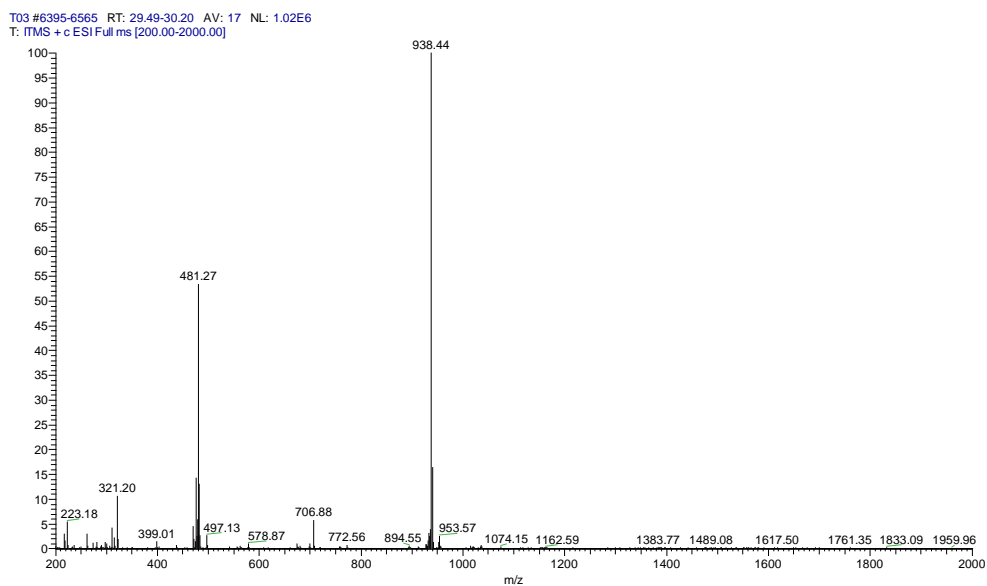

Figure S2. ESI-MS spectrum of compound T2.

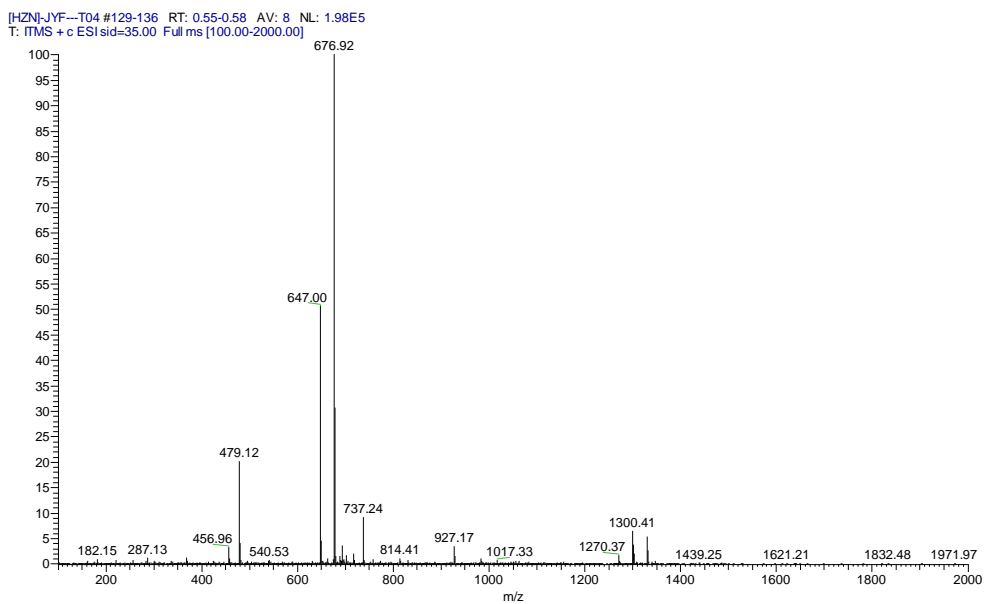

Figure S3. ESI-MS spectrum of compound T3.

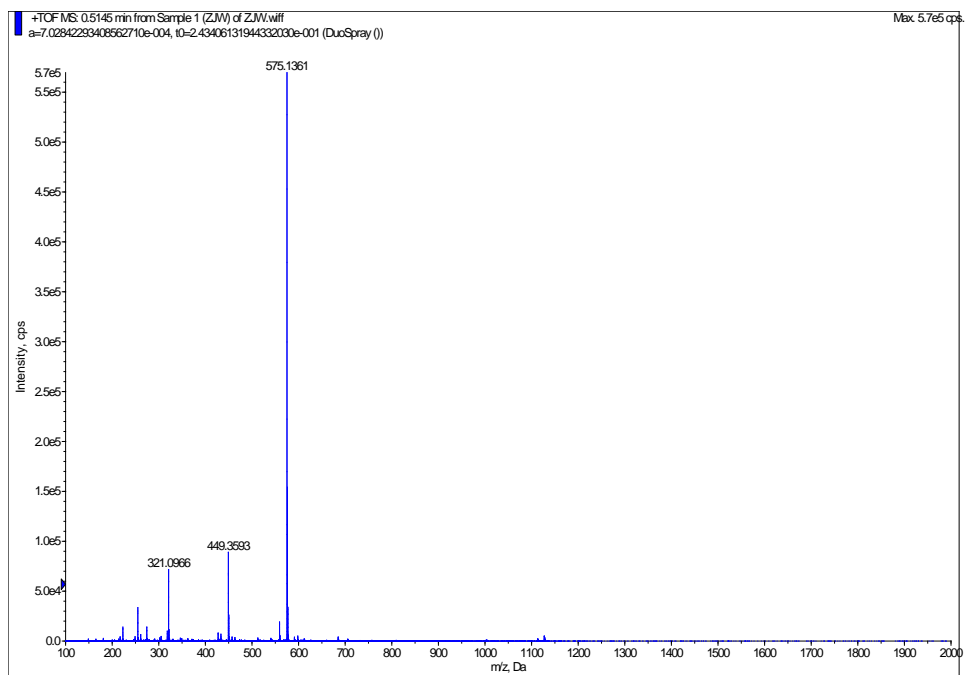

Figure S4. HR-ESI-MS spectrum of compound T4.

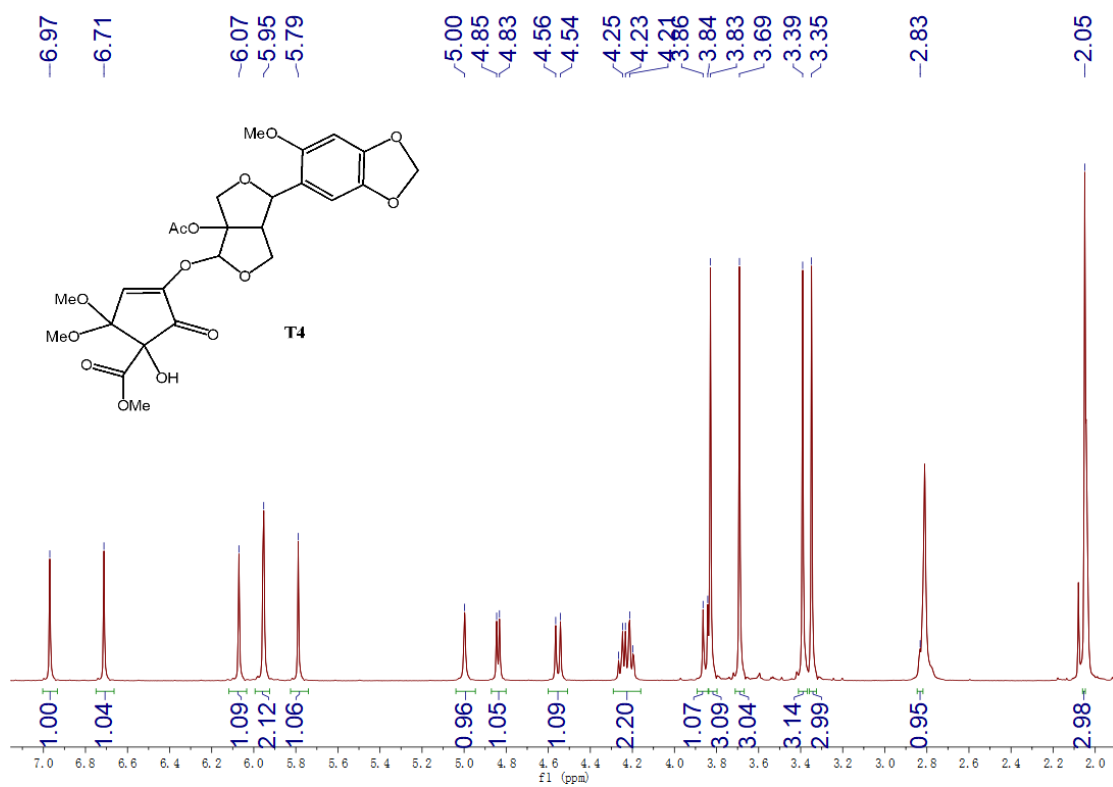

Figure S5. <sup>1</sup>H NMR spectrum of compound **T4** in C<sub>3</sub>D<sub>6</sub>O.

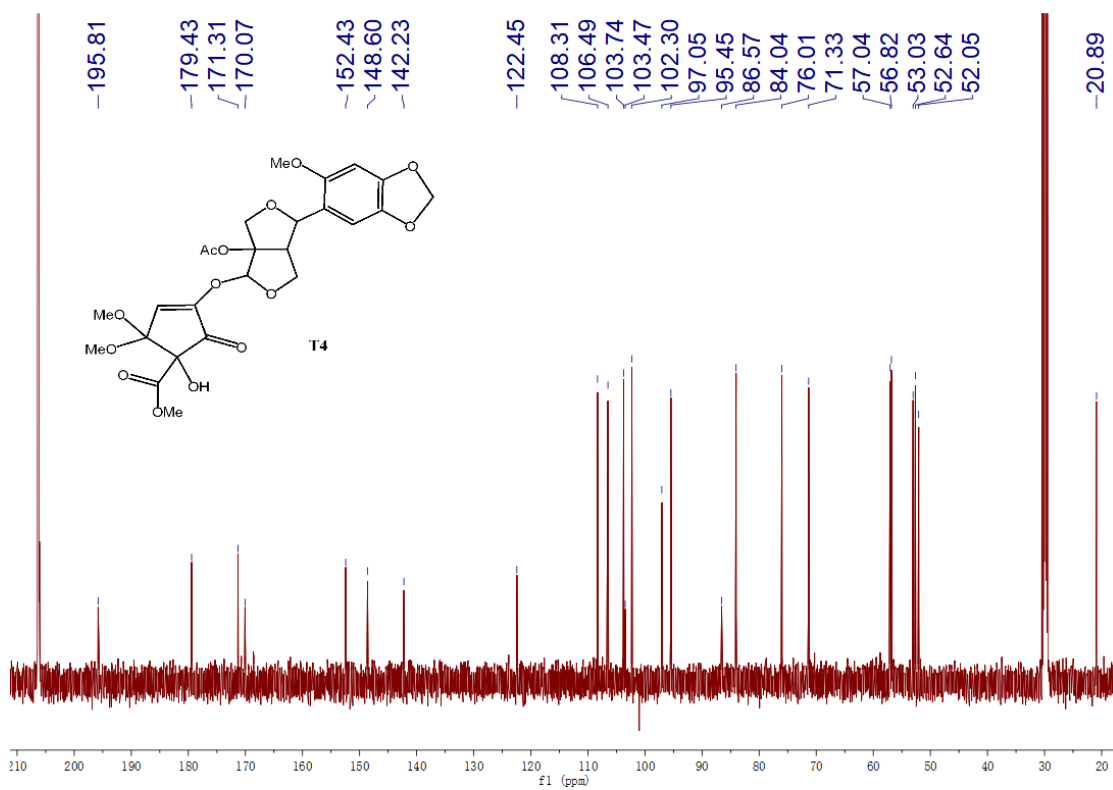

Figure S6. <sup>13</sup>C NMR spectrum of compound **T4** in C<sub>3</sub>D<sub>6</sub>O.

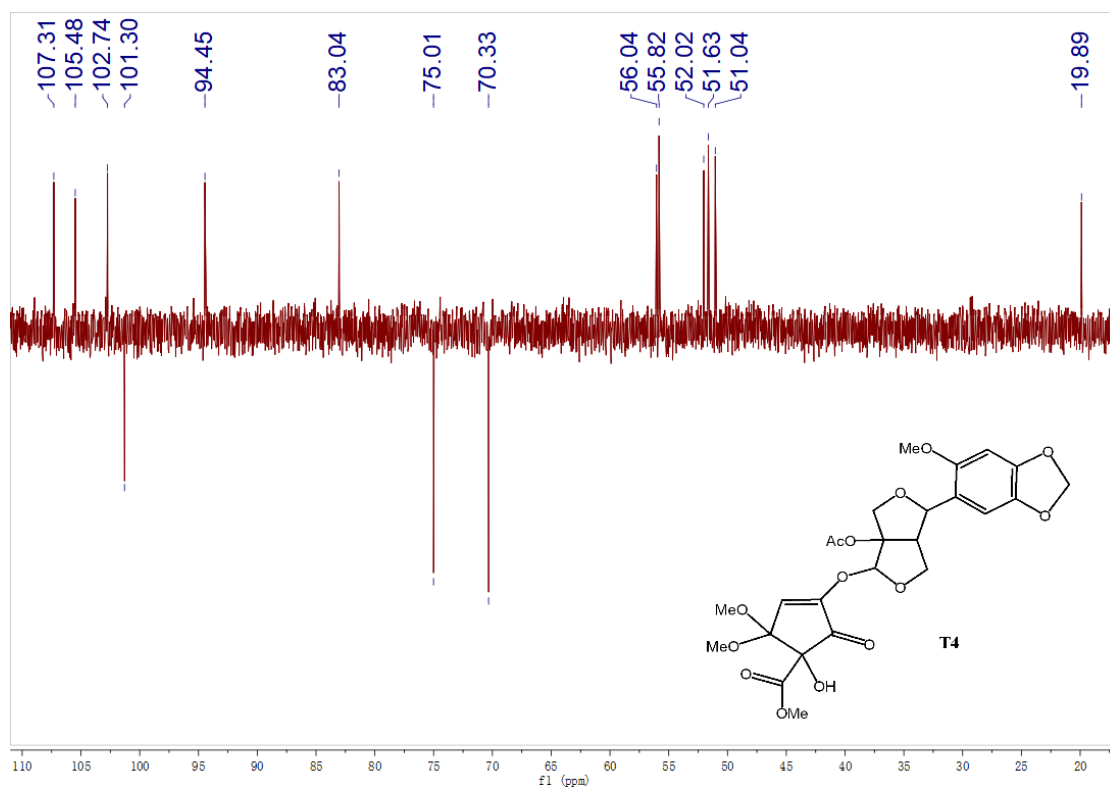

Figure S7. DEPT 135° spectrum of compound T4 in C<sub>3</sub>D<sub>6</sub>O.

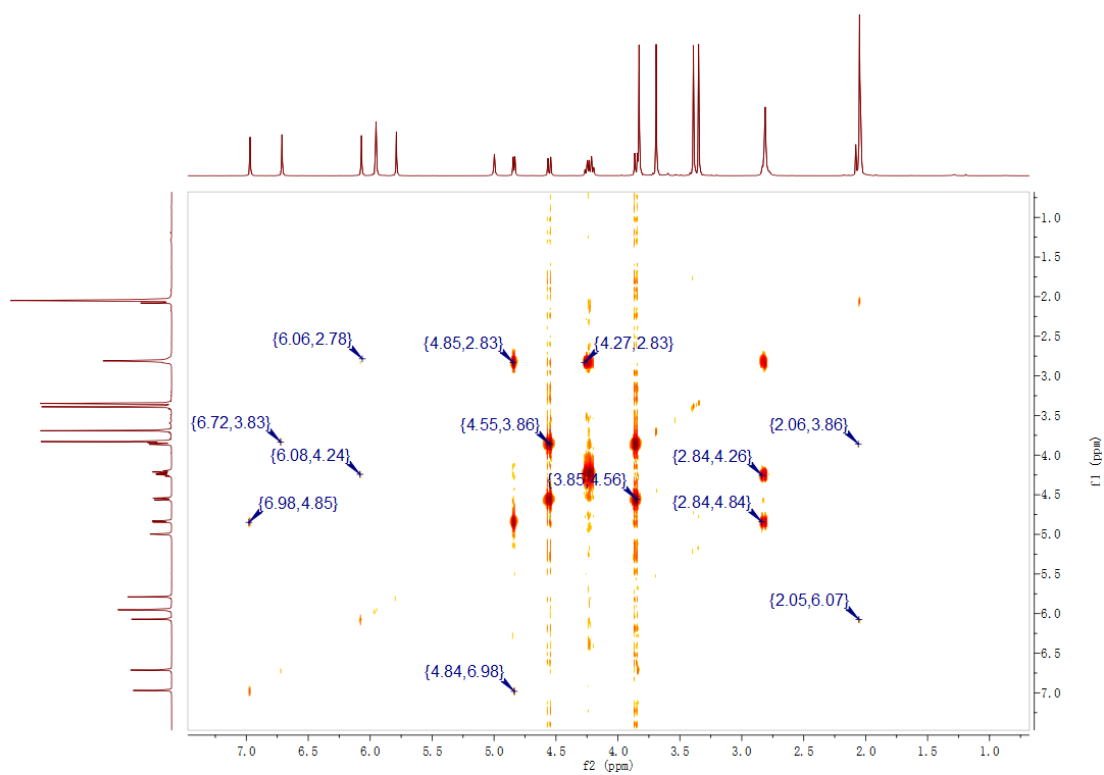

Figure S8. <sup>1</sup>H-<sup>1</sup>H COSY spectrum of compound T4 in C<sub>3</sub>D<sub>6</sub>O.

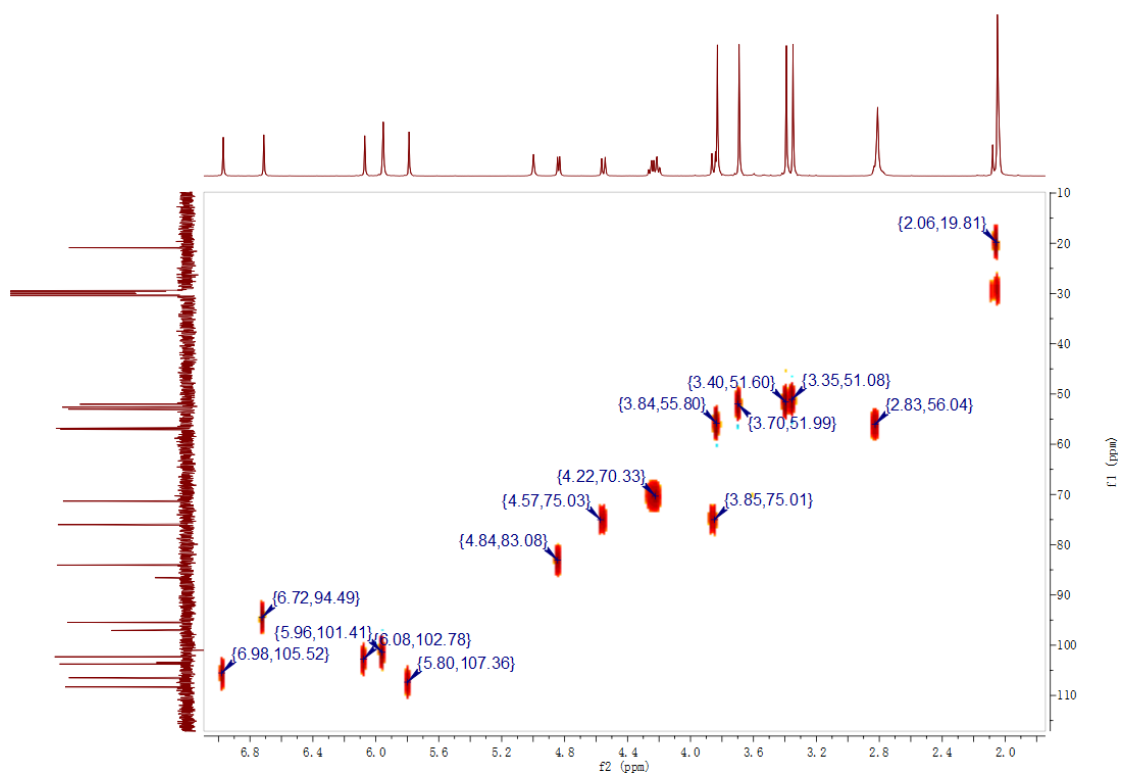

Figure S9. HSQC spectrum of compound T4 in C<sub>3</sub>D<sub>6</sub>O.

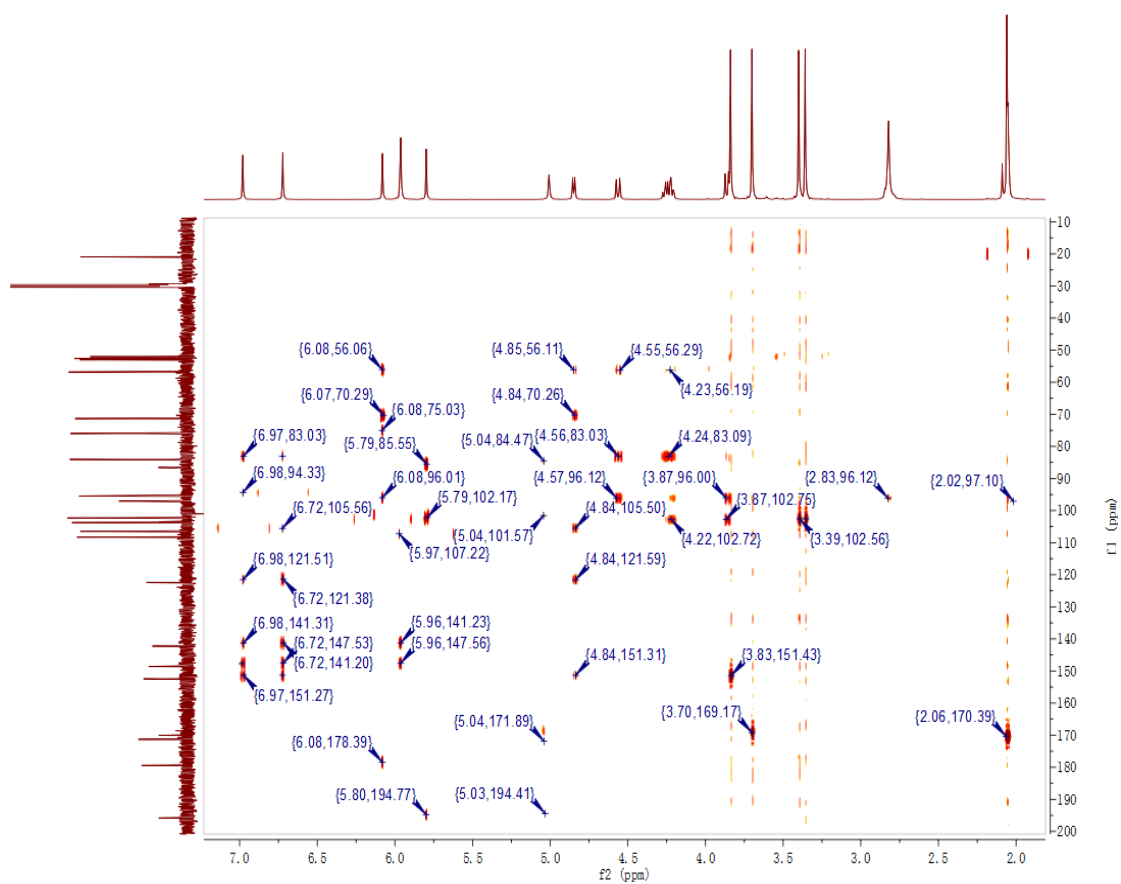

Figure S10. HMBC spectrum of compound T4 in C<sub>3</sub>D<sub>6</sub>O.

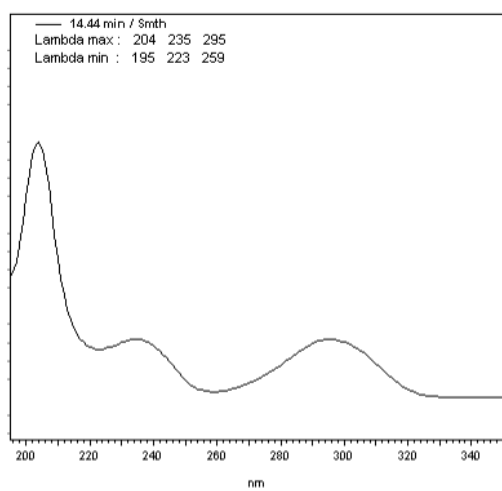

Phymarolin I (T1)

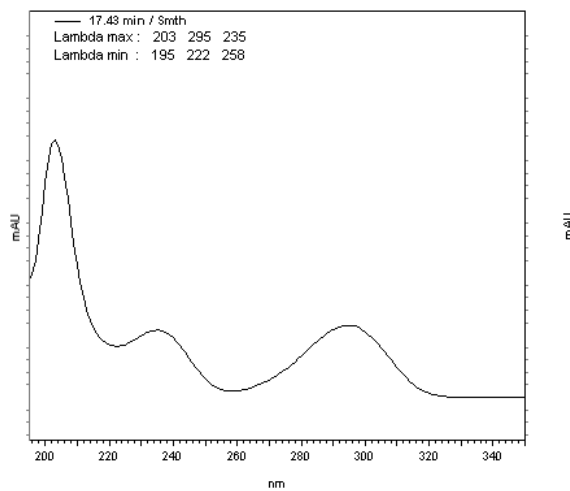

Phymarolin II (T2)

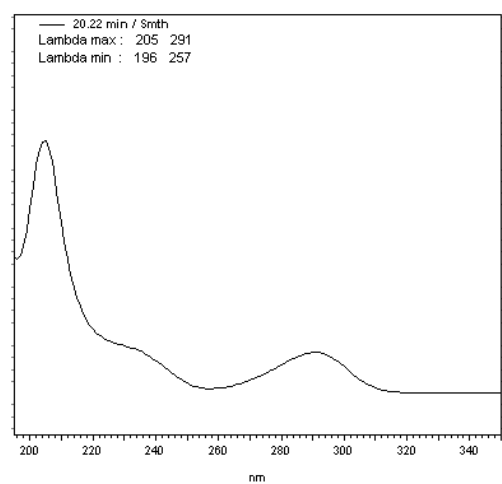

Haedoxan A (T3)

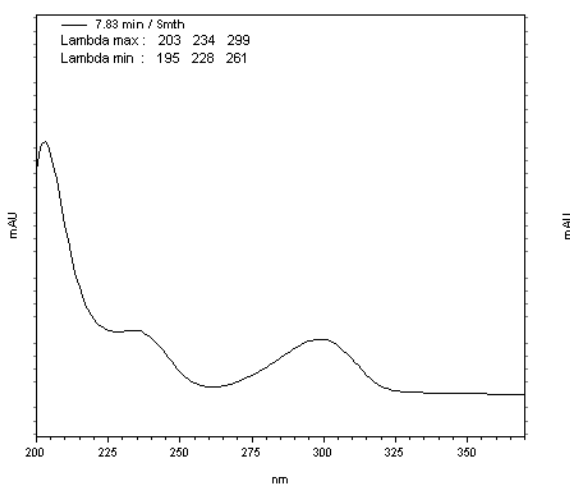

T4

Figure S11. UV spectra of compound T1-T4.

**Table S1** <sup>1</sup>H NMR (500 MHz) and <sup>13</sup>C NMR (126 MHz) data of compounds **T1**, **T2** and **T3** measured in CDCl<sub>3</sub> (*J* in Hz).

| Position             | T1                                     |                           | T2                                     |                           | T3                                      |                           |
|----------------------|----------------------------------------|---------------------------|----------------------------------------|---------------------------|-----------------------------------------|---------------------------|
|                      | $\delta_{\text{H}}$ (ppm)              | $\delta_{\text{C}}$ (ppm) | $\delta_{\text{H}}$ (ppm)              | $\delta_{\text{C}}$ (ppm) | $\delta_{\text{H}}$ (ppm)               | $\delta_{\text{C}}$ (ppm) |
| 1                    |                                        | 147.59                    |                                        | 152.01                    |                                         | 131.31                    |
| 2                    | 6.52 (s, 1H)                           | 106.45                    | 6.58 (d, <i>J</i> = 2.3 Hz, 1H)        | 106.45                    |                                         | 138.19                    |
| 3                    |                                        | 141.48                    |                                        | 148.20                    |                                         | 131.19                    |
| 4                    |                                        | 140.94                    |                                        | 141.55                    |                                         | 147.81                    |
| 5                    | 6.83 (s, 1H)                           | 94.37                     | 6.69 (d, <i>J</i> = 8.4 Hz, 1H)        | 108.16                    | 6.29 (s, 1H)                            | 89.78                     |
| 6                    |                                        | 143.02                    | 6.49 (dd, <i>J</i> = 8.4, 2.3 Hz, 1H)  | 110.62                    |                                         | 144.95                    |
| 7                    | 5.68 (s, 1H)                           | 101.82                    | 5.70 (s, 1H)                           | 101.44                    | 5.24 (s, 1H)                            | 106.56                    |
| 8                    |                                        | 96.55                     |                                        | 96.59                     |                                         | 92.55                     |
|                      | 3.81 (d, <i>J</i> = 11.1 Hz, 1H);      |                           | 3.81 (d, <i>J</i> = 11.1 Hz, 1H);      |                           | 3.74 (d, <i>J</i> = 10.0 Hz, 1H);       |                           |
|                      | 4.61 (d, <i>J</i> = 11.1 Hz, 1H)       | 75.76                     | 4.60 (d, <i>J</i> = 11.1 Hz, 1H)       | 75.79                     | 4.30 (d, <i>J</i> = 9.6 Hz, 1H)         | 76.65                     |
| 9                    |                                        |                           |                                        |                           |                                         |                           |
| 10                   | 5.93 (s, 2H)                           | 101.36                    | 5.93 (s, 2H)                           | 101.39                    | 5.87 (d, <i>J</i> = 2.6 Hz, 2H)         | 101.40                    |
| 1'                   |                                        | 121.54                    |                                        | 121.52                    |                                         | 123.31                    |
| 2'                   | 7.05 (s, 1H)                           | 104.03                    | 7.05 (s, 1H)                           | 103.19                    | 7.31 (s, 1H)                            | 107.77                    |
| 3'                   |                                        | 140.44                    |                                        | 143.50                    |                                         | 137.10                    |
| 4'                   |                                        | 145.75                    |                                        | 147.66                    |                                         | 143.05                    |
| 5'                   | 6.52 (s, 1H)                           | 96.24                     | 6.52 (s, 1H)                           | 94.42                     | 6.49 (s, 1H)                            | 100.02                    |
| 6'                   |                                        | 151.56                    |                                        | 151.58                    |                                         | 150.83                    |
| 7'                   | 4.88 (d, <i>J</i> = 6.9 Hz, 1H)        | 83.10                     | 4.87 (d, <i>J</i> = 7.0 Hz, 1H)        | 83.05                     | 4.99 (d, <i>J</i> = 8.0 Hz, 1H)         | 83.98                     |
| 8'                   | 2.90 (t, <i>J</i> = 6.4 Hz, 1H)        | 57.11                     | 2.84 (t, <i>J</i> = 6.6 Hz, 1H)        | 56.65                     | 2.64 (t, <i>J</i> = 7.5 Hz, 1H)         | 57.98                     |
|                      | 4.05 (dd, <i>J</i> = 9.1, 1.8 Hz, 1H); |                           | 4.06 (dd, <i>J</i> = 9.2, 1.5 Hz, 1H); |                           | 4.05 (dd, <i>J</i> = 9.1, 2.3 Hz, 1H);  |                           |
| 9'                   | 4.40 (dd, <i>J</i> = 9.1, 7.0 Hz, 1H)  | 68.97                     | 4.29 (dd, <i>J</i> = 9.1, 6.9 Hz, 1H)  | 68.76                     | 4.59-4.54 (m, 1H)                       | 71.92                     |
| 10'                  | 5.87 (dd, <i>J</i> = 4.4, 1.3 Hz, 2H)  | 101.32                    | 5.92 (s, 2H)                           | 101.36                    |                                         |                           |
| 1''                  |                                        |                           |                                        |                           |                                         | 130.66                    |
| 2''                  |                                        |                           |                                        |                           | 6.83-6.92 (m, 1H)                       | 108.58                    |
| 3''                  |                                        |                           |                                        |                           |                                         | 148.18                    |
| 4''                  |                                        |                           |                                        |                           |                                         | 148.11                    |
| 5''                  |                                        |                           |                                        |                           | 6.83-6.92 (m, 1H)                       | 115.40                    |
| 6''                  |                                        |                           |                                        |                           | 6.83-6.92 (m, 1H)                       | 121.44                    |
| 7''                  |                                        |                           |                                        |                           | 4.93 (d, <i>J</i> = 6.0 Hz, 1H)         | 77.35                     |
| 8''                  |                                        |                           |                                        |                           | 4.00 (d, <i>J</i> = 5.3 Hz, 1H)         | 77.74                     |
|                      |                                        |                           |                                        |                           | 3.30 (dd, <i>J</i> = 11.0, 3.7 Hz, 1H); |                           |
|                      |                                        |                           |                                        |                           | 3.58 (dd, <i>J</i> = 11.0, 2.2 Hz, 1H)  | 71.37                     |
| 9''                  |                                        |                           |                                        |                           |                                         |                           |
| 10''                 |                                        |                           |                                        |                           | 5.99 (s, 2H)                            | 101.22                    |
| 2-OCH <sub>3</sub>   |                                        |                           |                                        |                           | 4.02 (s, 3H)                            | 60.25                     |
| 6-OCH <sub>3</sub>   | 3.77 (s, 3H)                           | 56.36                     |                                        |                           | 3.73 (s, 3H)                            | 57.05                     |
| 6'-OCH <sub>3</sub>  | 3.74 (s, 3H)                           | 56.35                     | 3.77 (s, 3H)                           | 56.38                     | 3.78 (s, 3H)                            | 55.89                     |
| CH <sub>3</sub> C'O- |                                        | 170.95                    |                                        | 170.90                    |                                         |                           |
| C'H <sub>3</sub> CO- | 2.13 (s, 3H)                           | 21.22                     | 2.13 (s, 3H)                           | 21.23                     |                                         |                           |
| 9''-OCH <sub>3</sub> |                                        |                           |                                        |                           | 3.35 (s, 3H)                            | 59.68                     |
